# Supplementary material for: Reactogenicity of Simultaneous COVID-19 mRNA Booster and Influenza Vaccination in the US
Source: PubMed Central journal article supplement (PMC9287747; doi:10.1001/jamanetworkopen.2022.22241), 2022-07-15
Supplement: jamanetwopen-e2222241-s001.pdf [file jamanetwopen-e2222241-s001.pdf]

## Supplemental Online Content

Hause AM, Zhang B, Yue X, et al. Reactogenicity of simultaneous COVID-19 mRNA booster and influenza vaccination in the United States. *JAMA Netw Open*. 2022;5(7):e2222241. doi:10.1001/jamanetworkopen.2022.22241

**eMethods.** v-safe Health Survey Sent During Days 0-7 Following Vaccination

This supplemental material has been provided by the authors to give readers additional information about their work.

## eMethods

### v-safe Health Survey sent during Days 0-7 following Vaccination

1. How are you feeling today?

- Good
- Fair
- Poor

2. Since your vaccination, have you had a fever or felt feverish?

- Yes
- No

(If Yes) Do you know your highest temperature reading from today?

- Yes- in degrees Fahrenheit
- Yes- in degrees Celsius
- No- I don't remember the reading
- No- I didn't take my temperature

Enter your highest temperature reading from today (degrees Fahrenheit):

\_\_\_\_\_

Enter your highest temperature reading from today (degrees Celsius):

\_\_\_\_\_

3. Have you had any of these symptoms at or near the injection site? Select all that apply.

- Pain
- Redness
- Swelling
- Itching
- None

(For each checked symptom) How would you rate your symptom?

- Mild = you notice symptoms, but they aren't a problem
- Moderate = symptoms that limit of your normal daily activities
- Severe = symptoms make normal daily activities difficult or impossible

4. Have you experienced any of these symptoms today? Select all that apply.

- Chills
- Headache
- Joint pain
- Muscle or body aches
- Fatigue or tiredness
- Nausea
- Vomiting
- Diarrhea
- Abdominal pain
- Rash, not including the immediate area around the injection site

- None

(For each checked symptom) How would you rate your symptom?

- Mild = you notice symptoms, but they aren't a problem
- Moderate = symptoms that limit of your normal daily activities
- Severe = symptoms make normal daily activities difficult or impossible

5. Any other symptoms or health conditions you want to report\_\_\_\_\_

6. Did any of the symptoms or health conditions you reported TODAY cause you to (select all that apply):

- Be unable to work or attend school?
- Be unable to do your normal daily activities?
- Get care from a doctor or other healthcare professional?
- None of the above

(If "Get care..." checked) What type of healthcare visit did you have? (check all that apply)

- Telehealth, virtual health, or email health consultation
- Outpatient clinic or urgent care clinic visit
- Emergency room or emergency department visit
- Hospitalization
- Other, describe:

---
